# Supplementary material for: Transcriptomic Analysis of Differentially Expressed Lipid Metabolism-Related Genes and Immune Infiltration Characteristics in Psoriasis Patients
Source: Research Square preprint supplement (doi:10.21203/rs.3.rs-5326931/v1), 2024-12-17

Supplementary Figure

Supplementary Figure 1 . ROC curves of the hub genes. (A) ROC curves of CRAT. (B) ROC curves of AGPAT1. (C) ROC curves of PEX11A .(D) ROC curves of APOC1. (E) ROC curves of TMPRSS11E. (F) ROC curves of INSIG1. (G) ROC curves of ACSL1. (H) ROC curves of FBP1. (I) ROC curves of MGST1.


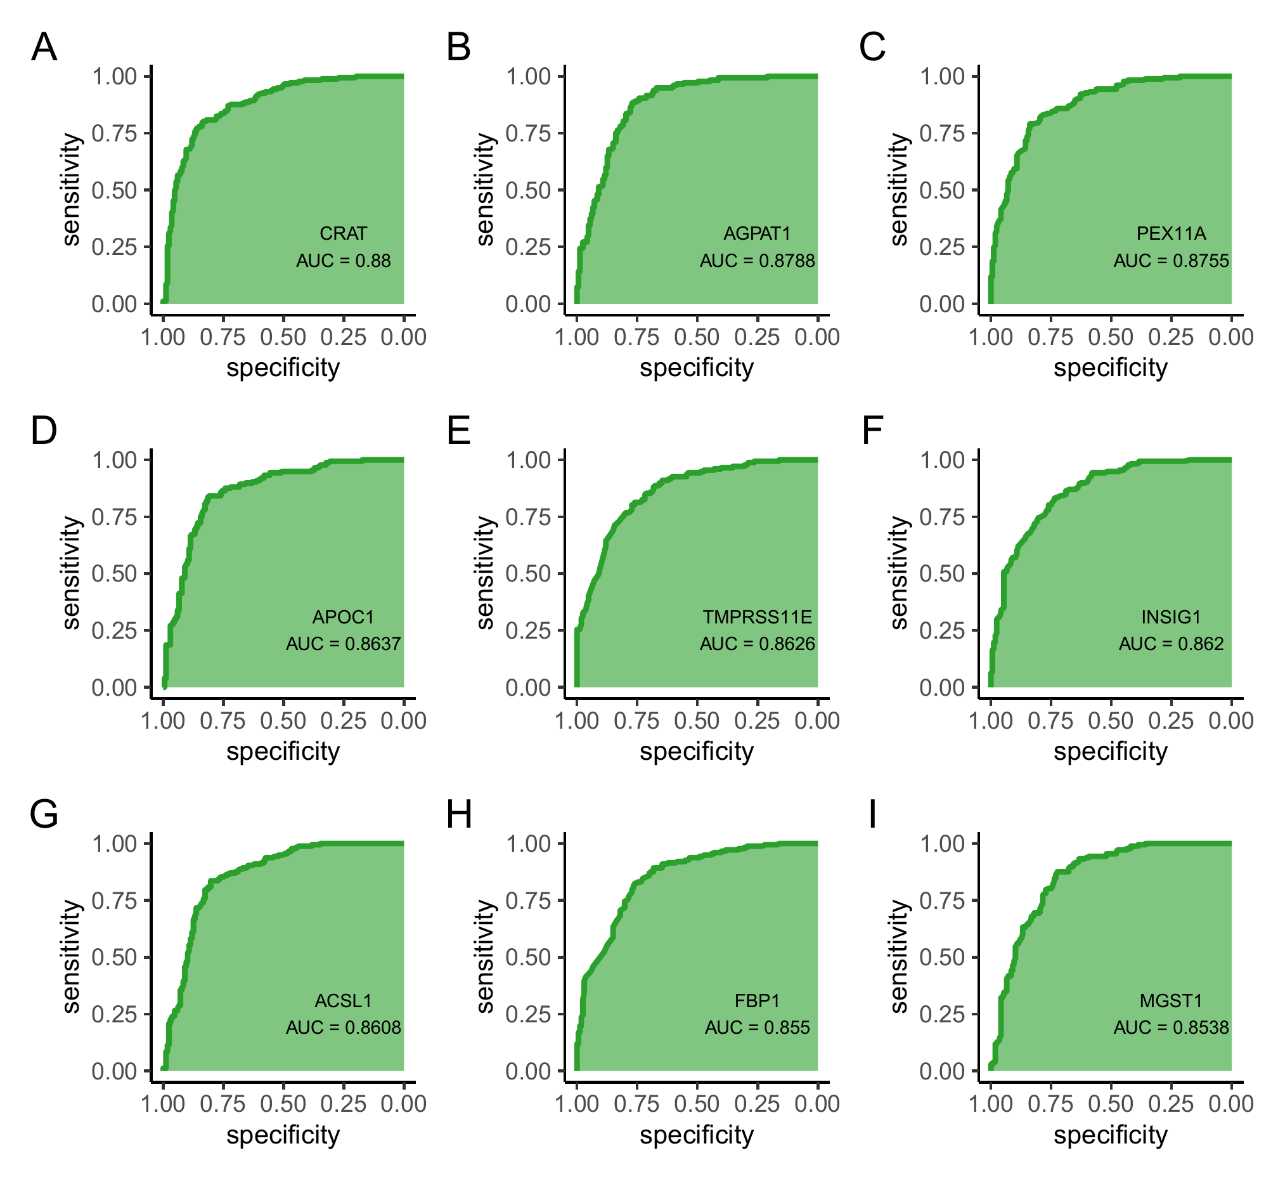

Supplement: Supplementary file 1 [file de6eeccf64f01528d8cadfd7.docx]
